# Supplementary material
Source: PubMed Central journal article supplement (PMC4509814)

**Figure S1**

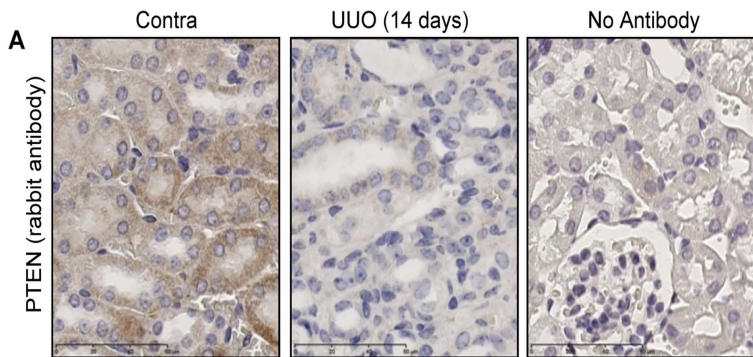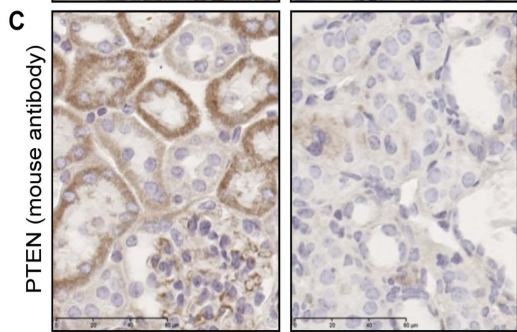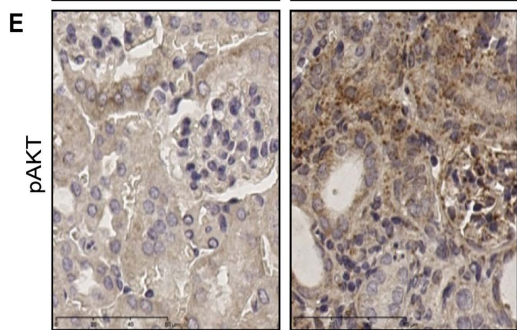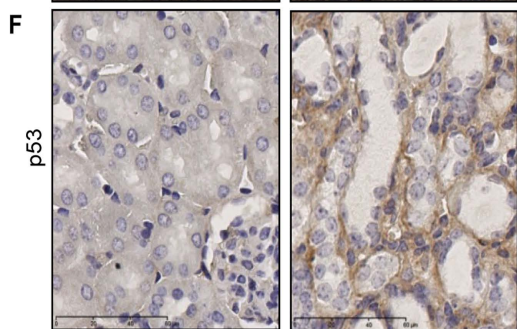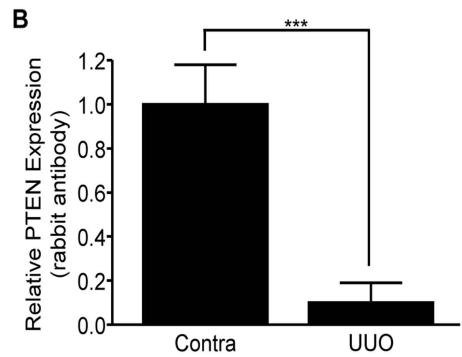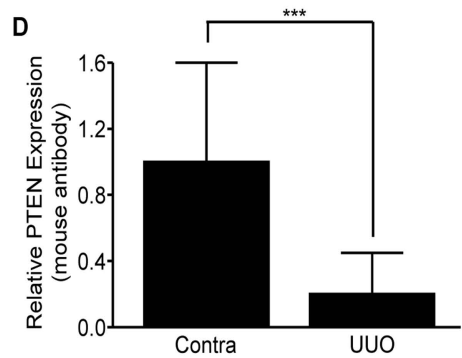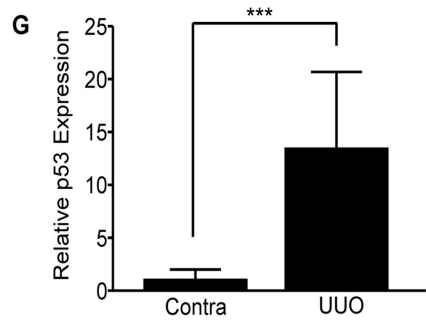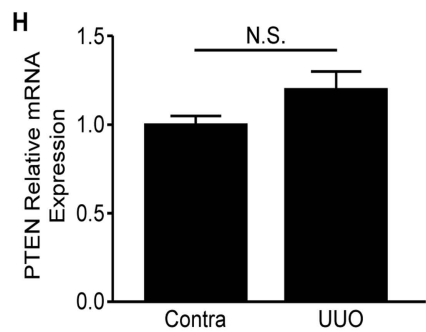

**Figure S2**

**A**

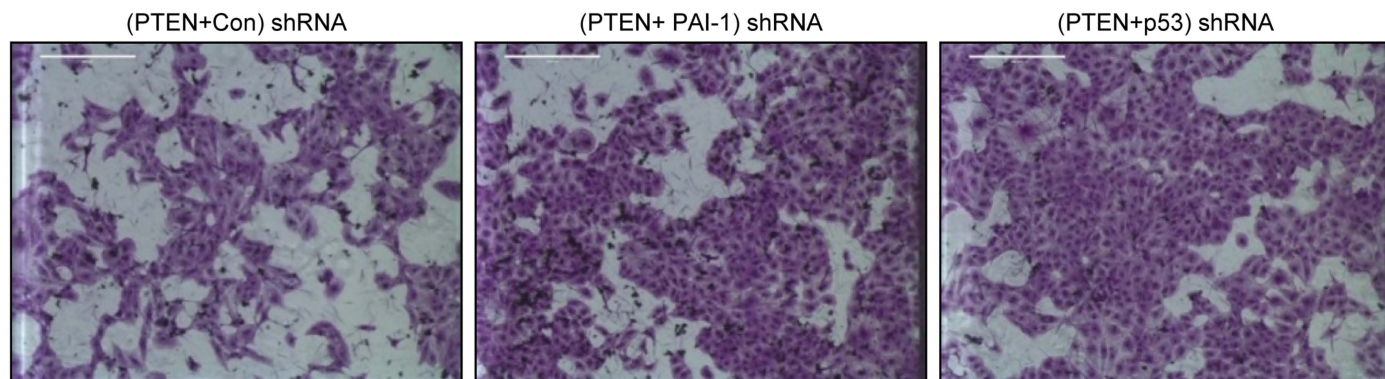

**B**

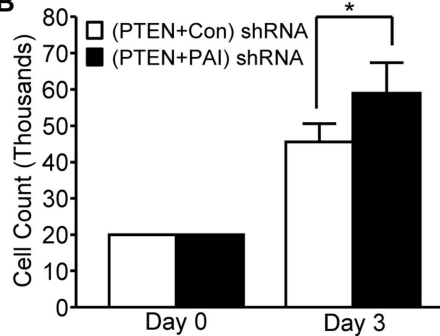

**C**

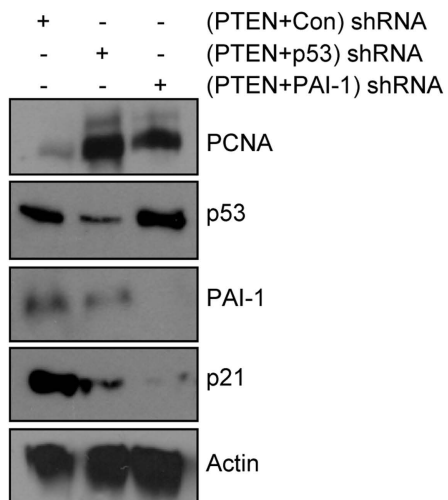

**D**

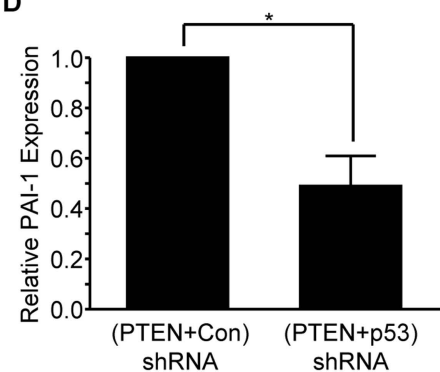

**E**

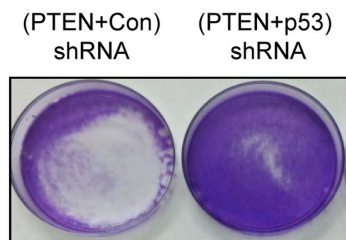

**F**

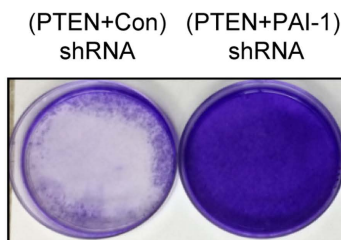

### Figure S3

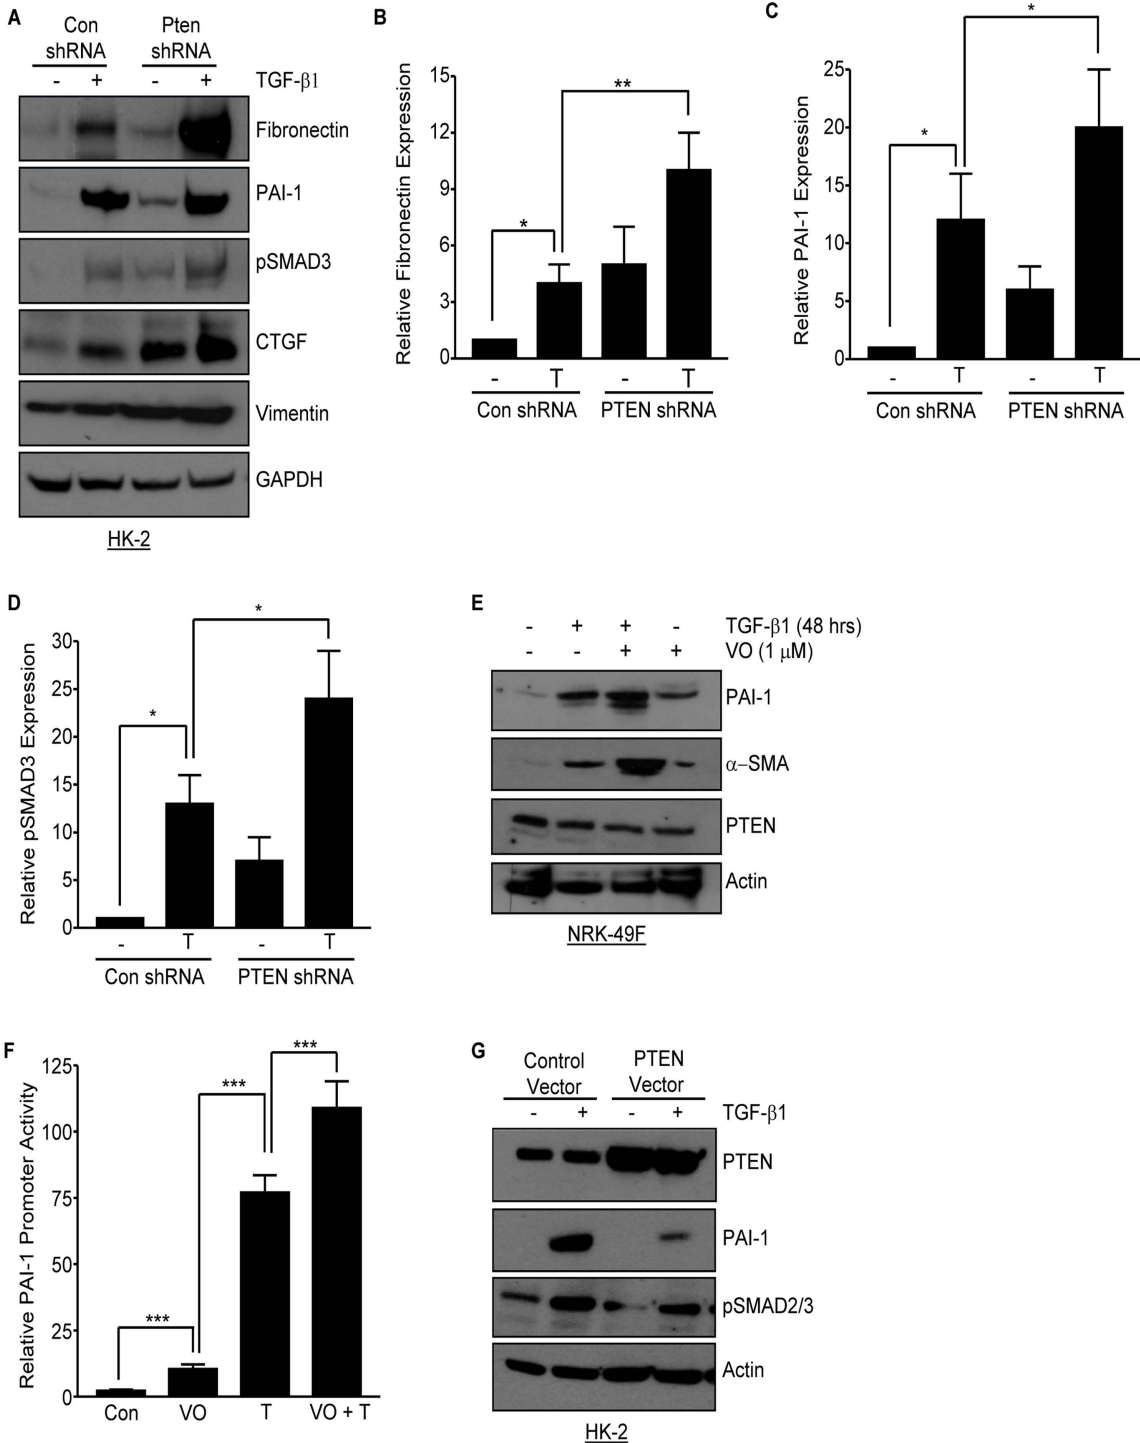

**Figure S4**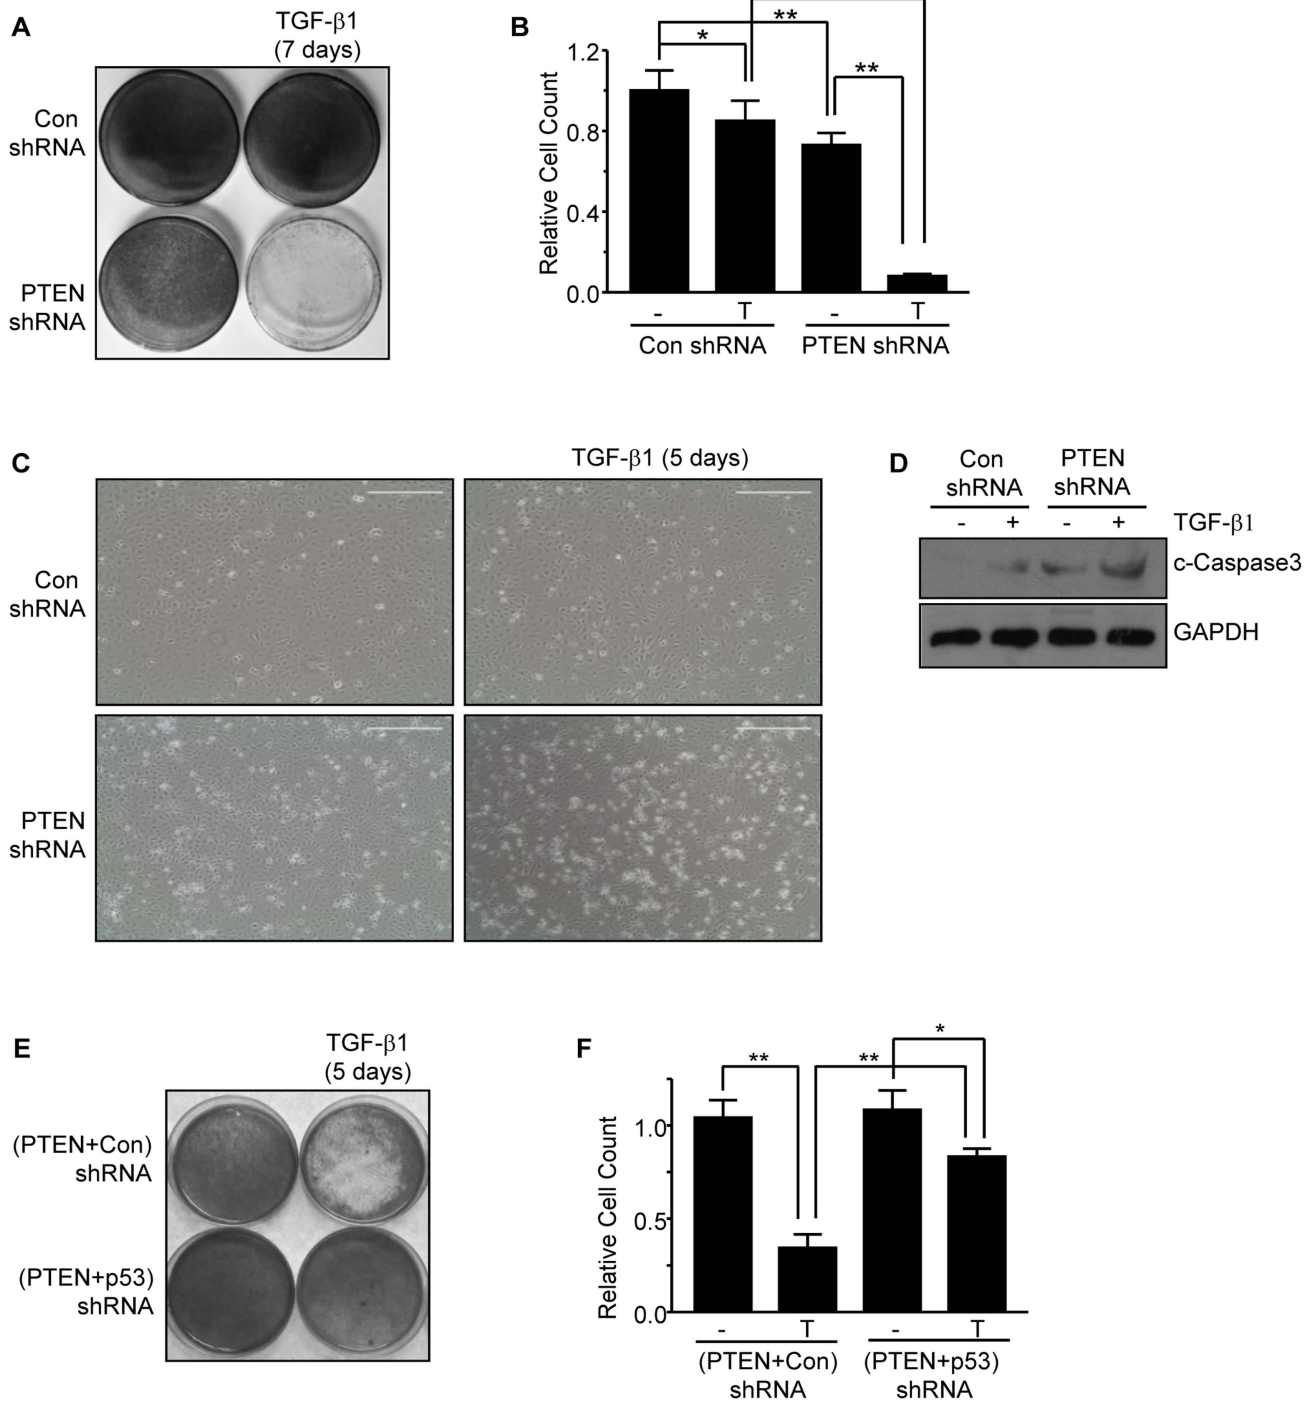

Supplement: NIHMS675349-supplement-Supp_FigureS1-S4.pdf [file NIHMS675349-supplement-Supp_FigureS1-S4.pdf]
